# Supplementary material for: Energy conversion efficiency comparison of different aqueous and semi-aqueous CO2 electroreduction systems
Source: Royal Society of Chemistry journal article supplement (doi:10.1039/d2ay01087a), 2022-01-01
Supplement: d2ay01087a1.pdf [file d2ay01087a1.pdf]

Supplementary Information for

Energy conversion efficiency comparison of different aqueous and semi-aqueous  
CO<sub>2</sub> electroreduction systems

Shofu Matsuda, Misa Tanaka, Minoru Umeda\*

*Department of Materials Science and Technology, Graduate School of Engineering,  
Nagaoka University of Technology, 1603-1 Kamitomioka, Nagaoka, Niigata 940-2188,  
Japan*

**Table S1.** Standard chemical potentials of chemicals appearing in CO<sub>2</sub>-reduction reactions (taken from Pourbaix diagrams).<sup>S1,S2</sup>

| Chemicals                        | Standard chemical potential ( $\mu^{\circ}$ ) [kJ/mol] |
|----------------------------------|--------------------------------------------------------|
| CH <sub>4</sub>                  | -50.8                                                  |
| CO <sub>2</sub>                  | -394.4                                                 |
| H <sub>2</sub> O                 | -237.2                                                 |
| H <sub>2</sub>                   | 0                                                      |
| H <sup>+</sup>                   | 0                                                      |
| O <sub>2</sub>                   | 0                                                      |
| CO                               | -137.3                                                 |
| C <sub>2</sub> H <sub>4</sub>    | -198.5                                                 |
| HCOOH                            | -356.1                                                 |
| CH <sub>3</sub> OH               | -166.3                                                 |
| C <sub>2</sub> H <sub>5</sub> OH | -174.8                                                 |

(S1) M. Pourbaix, *Atlas of Electrochemical Equilibria in Aqueous Solutions*; National Association of Corrosion Engineers: Texas, 1974.

(S2) P. Atkins and J. de Paula, *Elements of Physical Chemistry*; 6th ed.; Oxford University Press: Oxford, 2013.

### ***Detail of the assumption of employing the H<sub>2</sub>O oxidation reaction as a reference***

The theoretical potential of CH<sub>4</sub>-generation reaction is derived in the cases of following three reactions (S-1), (S-2), and (S-3).

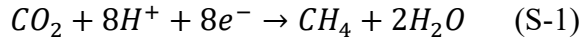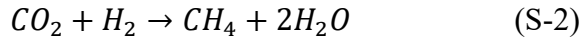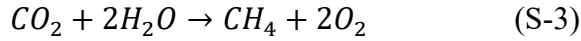

For Eq. (S-1), based on Table 1 and Eq. (2),  $\Delta G^o = -130,667.6$  [J/mol] is derived. Substituting the obtained  $\Delta G^o$ ,  $n = 8$ , and  $F = 96,485$  [C/mol] into Eq. (1) gives  $E^o = 0.169$  [V].

For Eq. (S-2), considering it the sum of the two reactions of Eq. (S-1) and the following equation:

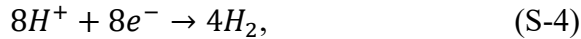

$\Delta G^o = -130,667.6$  [J/mol] is derived. Therefore,  $E^o = 0.169$  [V] is obtained using Eq. (1).

In other words, the standard electrode potential of the targeted half-reaction (Eq. (1)) can be obtained by employing  $2H^+ + 2e^- \rightarrow H_2$  with  $\Delta G^o = 0$  as the counter-electrode reaction. However, when the energy conversion efficiency of Eq. (S-1) is calculated as a reference of H<sub>2</sub> oxidation, the calculation is incorrect because  $\varepsilon_{ec} < 0$  is often obtained due to  $V_0 < 0$ .

For Eq. (S-3), considering it the sum of the two reactions of Eq. (S-1) and the following equation:

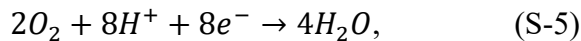

$\Delta G^o = -817,189.2$  [J/mol] is obtained. Substituting the obtained  $\Delta G^o$ ,  $n = 8$ , and  $F = 96,485$  [C/mol] into Eq. (1) gives  $E^o = 1.059$  [V]. In this case, O<sub>2</sub> reduction reaction (reverse reaction of H<sub>2</sub>O oxidation;  $E^o = 1.228$  [V]) is the standard, resulting in obtaining the theoretical potential of Eq. (1) of  $E^o = 1.228 - 1.059 = 0.169$  [V]. Therefore, it is possible to calculate and compare the energy conversion efficiency of half-cell CO<sub>2</sub> reductions in the aqueous and semi-aqueous systems by employing H<sub>2</sub>O oxidation reaction without overvoltage ( $\eta_A = 0$ ) as a reference.

**Table S2.** Energy conversion efficiencies for the production of **(a)** CO, **(b)** HCOOH, **(c)** C<sub>2</sub>H<sub>4</sub>, and **(d)** CH<sub>4</sub> under each CO<sub>2</sub> reduction condition. Data are taken from Table 2. Note that  $T$ ,  $E_{\text{red}}$ ,  $i$ ,  $\eta_C$ ,  $\varepsilon_F$ , and  $\varepsilon_{\text{ec}}$  represent the temperature, electrode potential at which CO<sub>2</sub> reduction occurs, current density, cathodic overpotential, faradaic efficiency, and energy conversion efficiency, respectively. The full name of RHE is reversible hydrogen electrode.

**(a) CO production**

| No | Electrocatalyst                   | Electrolyte              | Product           | $T / \text{K}$ | pH   | $E_{\text{red}}$ | $i / \text{mA cm}^{-2}$ | $\eta_C / \text{V}$ | $\varepsilon_F / \%$ | $\varepsilon_{\text{ec}} / \%$ | Ref. |
|----|-----------------------------------|--------------------------|-------------------|----------------|------|------------------|-------------------------|---------------------|----------------------|--------------------------------|------|
| 3  | ZnO sheet                         | 0.1 M KHCO <sub>3</sub>  | CO                | 298            | 6.8  | -1.399 V vs. SHE | 11.5                    | 1.29                | 85                   | 43.2                           | (15) |
| 4  | Cornstarch-N-Ni                   | 0.5 M KHCO <sub>3</sub>  | CO                | 298            | 7.2  | -0.8 V vs. RHE   | 11.6                    | 0.694               | 92                   | 60.5                           | (16) |
| 9  | Pt/C                              | Nafion                   | CO <sub>ads</sub> | 313            | -0.4 | 0.175 V vs. SHE  | 3.7                     | -0.281              | 75                   | 95.0                           | (20) |
| 11 | FeN <sub>4</sub> /C               | 0.1 M KHCO <sub>3</sub>  | CO                | 298            | 6.7  | -0.6 V vs. RHE   | 13                      | 0.494               | 93                   | 67.9                           | (21) |
| 13 | Cu-Ni hollow fibre                | 0.1 M KHCO <sub>3</sub>  | CO                | 293            | 6.7  | -1.3 V vs. RHE   | 13.6                    | 1.19                | 77.5                 | 40.9                           | (23) |
| 15 | Bi single atoms                   | 0.1 M NaHCO <sub>3</sub> | CO                | 298            | 6.7  | -0.5 V vs. RHE   | 4                       | 0.394               | 97                   | 74.9                           | (25) |
| 17 | Zn/Ag foams                       | 0.1 M KHCO <sub>3</sub>  | CO                | 298            | 6.7  | -1.24 V vs. RHE  | 9.5                     | 1.13                | 73.3                 | 39.6                           | (26) |
| 24 | Au                                | 0.2 M KHCO <sub>3</sub>  | CO                | 298            | 6.8  | -0.39 V vs. RHE  | 0.017                   | 0.284               | 30                   | 24.7                           | (30) |
| 25 | Co-N <sub>5</sub>                 | 0.2 M NaHCO <sub>3</sub> | CO                | 298            | 6.9  | -0.73 V vs. RHE  | 4.5                     | 0.624               | 99                   | 67.4                           | (31) |
| 29 | Ag nanoplate                      | 0.1 M KHCO <sub>3</sub>  | CO                | 298            | 6.7  | -0.85 V vs. RHE  | 1.25                    | 0.744               | 96.8                 | 62.1                           | (35) |
| 30 | Ni-N <sub>4</sub> -C              | 0.5 M KHCO <sub>3</sub>  | CO                | 298            | 7.3  | -0.81 V vs. RHE  | 28.6                    | 0.704               | 99                   | 64.8                           | (36) |
| 31 | Au nanoparticle                   | 0.5 M KHCO <sub>3</sub>  | CO                | 298            | 7.3  | -0.47 V vs. RHE  | 8                       | 0.364               | 80                   | 62.9                           | (37) |
| 32 | Li-Zn                             | 0.1 M KHCO <sub>3</sub>  | CO                | 298            | 6.7  | -1.17 V vs. RHE  | 30                      | 1.06                | 80                   | 44.5                           | (38) |
| 34 | SnO <sub>2</sub> porous nanowires | 0.1 M KHCO <sub>3</sub>  | CO                | 298            | 6.7  | -0.8 V vs. RHE   | 6.0                     | 0.694               | 11                   | 7.24                           | (39) |
| 35 | Zn                                | 0.5 M KCl                | CO                | 298            | 4.0  | -1.1 V vs. RHE   | 4.3                     | 0.994               | 95                   | 54.4                           | (40) |
| 44 | Ag/C                              | 0.5 M KHCO <sub>3</sub>  | CO                | 298            | 7.3  | -1.00 V vs. RHE  | 125 mA mg <sup>-1</sup> | 0.894               | 85.9                 | 51.4                           | (48) |
| 45 | Au                                | 0.5 M KHCO <sub>3</sub>  | CO                | 298            | 7.2  | -0.35 V vs. RHE  | 15                      | 0.244               | 95                   | 80.3                           | (49) |
| 46 | Oxide-derived-Cu                  | 0.1 M KHCO <sub>3</sub>  | CO                | 298            | 6.7  | -0.6 V vs. RHE   | 4.5                     | 0.494               | 90                   | 65.7                           | (50) |
| 49 | Cu-Sn alloy                       | 0.1 M KHCO <sub>3</sub>  | CO                | 298            | 6.8  | -0.6 V vs. RHE   | 1                       | 0.494               | 90                   | 65.7                           | (52) |
| 51 | Sn                                | 0.1 M KHCO <sub>3</sub>  | CO                | 298            | 6.7  | -1.36 V vs. RHE  | 17.1                    | 1.25                | 11.8                 | 6.08                           | (53) |
| 57 | Ag                                | 0.5 M KHCO <sub>3</sub>  | CO                | 298            | 7.2  | -0.75 V vs. RHE  | 10                      | 0.644               | 79.2                 | 53.4                           | (58) |
| 54 | Cu                                | 0.1 M KHCO <sub>3</sub>  | CO                | 298            | 6.8  | -0.847 V vs. RHE | 1                       | 0.741               | 6.12                 | 4.65                           | (63) |
| 69 | Cu nanoparticles                  | 0.1 M KHCO <sub>3</sub>  | CO                | 298            | 6.7  | -1.1 V vs. RHE   | 23                      | 0.994               | 5                    | 2.87                           | (65) |
| 71 | Cu-In alloy                       | 0.1 M KHCO <sub>3</sub>  | CO                | 298            | 6.7  | -0.60 V vs. RHE  | 0.6                     | 0.494               | 85                   | 62.0                           | (66) |
| 72 | Au nanoparticles                  | 0.5 M KHCO <sub>3</sub>  | CO                | 298            | 7.3  | -0.67 V vs. RHE  | 5 A g <sup>-1</sup>     | 0.564               | 90                   | 63.3                           | (67) |
| 73 | Au                                | 0.5 M NaHCO <sub>3</sub> | CO                | 298            | 7.2  | -0.35 V vs. RHE  | 4                       | 0.244               | 96                   | 81.2                           | (68) |

|     |     |                         |    |     |     |                 |     |      |      |       |      |
|-----|-----|-------------------------|----|-----|-----|-----------------|-----|------|------|-------|------|
| 75  | ZnO | 0.1 M KHCO <sub>3</sub> | CO | 298 | 6.7 | -1.45 V vs. RHE | 7.0 | 1.34 | 80   | 39.9  | (70) |
| 82  | Cu  | 0.1 M KHCO <sub>3</sub> | CO | 298 | 6.7 | -1.44 V vs. RHE | 5.0 | 1.33 | 1.3  | 0.650 | (72) |
| 84  | Au  |                         |    |     |     | -1.14 V vs. RHE | 5.0 | 1.03 | 87.1 | 49.1  |      |
| 86  | Ag  |                         |    |     |     | -1.37 V vs. RHE | 5.0 | 1.26 | 81.5 | 41.8  |      |
| 88  | Zn  |                         |    |     |     | -1.54 V vs. RHE | 5.0 | 1.43 | 79.4 | 38.3  |      |
| 91  | Pd  |                         |    |     |     | -1.20 V vs. RHE | 5.0 | 1.09 | 28.3 | 15.5  |      |
| 93  | Ga  |                         |    |     |     | -1.24 V vs. RHE | 5.0 | 1.13 | 23.2 | 12.5  |      |
| 96  | In  |                         |    |     |     | -1.55 V vs. RHE | 5.0 | 1.44 | 2.1  | 1.01  |      |
| 98  | Sn  |                         |    |     |     | -1.48 V vs. RHE | 5.0 | 1.37 | 7.1  | 3.50  |      |
| 101 | Cd  |                         |    |     |     | -1.63 V vs. RHE | 5.0 | 1.52 | 13.9 | 6.49  |      |

### (b) HCOOH production

| No | Electrocatalyst                                 | Electrolyte                                                                  | Product           | T / K | pH   | $E_{red}$        | $i / \text{mA cm}^{-2}$ | $\eta_c / \text{V}$ | $\epsilon_F / \%$    | $\epsilon_{cc} / \%$ | Ref. |
|----|-------------------------------------------------|------------------------------------------------------------------------------|-------------------|-------|------|------------------|-------------------------|---------------------|----------------------|----------------------|------|
| 2  | CuS nanosheet                                   | 0.5 M KHCO <sub>3</sub>                                                      | HCOO <sup>-</sup> | 298   | 7.2  | -0.7 V vs. RHE   | 50                      | 0.501               | 70.2                 | 52.0                 | (14) |
| 19 | Zn/Ag foams                                     | 0.1 M KHCO <sub>3</sub>                                                      | HCOO <sup>-</sup> | 298   | 6.7  | -1.24 V vs. RHE  | 0.3                     | 1.10                | 2.1                  | 1.16                 | (26) |
| 20 | Zr-organic frameworks                           | 0.5 M KHCO <sub>3</sub>                                                      | HCOOH             | 298   | 7.3  | -1.89 V vs. RHE  | 20                      | 1.75                | 4.2                  | 1.84                 | (27) |
| 26 | Pt-Ru black                                     | Nafion                                                                       | HCOOH             | 343   | -0.4 | 0.053 V vs. SHE  | 30                      | -0.252              | 4.5×10 <sup>-4</sup> | 5.5×10 <sup>-4</sup> | (32) |
| 33 | SnO <sub>2</sub> porous nanowires               | 0.1 M KHCO <sub>3</sub>                                                      | HCOOH             | 298   | 6.7  | -0.8 V vs. RHE   | 6.0                     | 0.601               | 80                   | 56.3                 | (39) |
| 36 | SnO <sub>2</sub>                                | 0.5 M NaHCO <sub>3</sub>                                                     | HCOOH             | 298   | 7.2  | -0.975 V vs. SHE | 50                      | 0.776               | 87                   | 56.4                 | (41) |
| 37 | Ag-Sn core-shell nanostructure                  | 0.5 M NaHCO <sub>3</sub>                                                     | HCOOH             | 298   | 7.2  | -0.8 V vs. RHE   | 16                      | 0.601               | 80                   | 56.3                 | (42) |
| 43 | Ultrathin Co <sub>3</sub> O <sub>4</sub> Layers | 0.1 M KHCO <sub>3</sub>                                                      | HCOOH             | 298   | 6.7  | -0.88 V vs. SHE  | 0.68                    | 0.681               | 60                   | 40.6                 | (47) |
| 47 | Oxide-derived-Cu                                | 0.1 M KHCO <sub>3</sub>                                                      | HCOOH             | 298   | 6.7  | -0.6 V vs. RHE   | 0.3                     | 0.401               | 5                    | 3.90                 | (50) |
| 50 | Sn                                              | 0.1 M KHCO <sub>3</sub>                                                      | HCOO <sup>-</sup> | 298   | 6.7  | -1.36 V vs. RHE  | 17.1                    | 1.16                | 71.6                 | 39.5                 | (53) |
| 58 | Pd-Pt-C                                         | 0.1 M KH <sub>2</sub> PO <sub>4</sub> /0.1 M K <sub>2</sub> HPO <sub>4</sub> | HCOOH             | 298   | 6.7  | -0.4 V vs. RHE   | 5                       | 0.201               | 91.8                 | 80.5                 | (59) |
| 61 | Pd/C                                            | 0.5 M NaHCO <sub>3</sub>                                                     | HCOO <sup>-</sup> | 298   | 7.2  | -0.35 V vs. RHE  | 3.45                    | 0.151               | 88                   | 79.6                 | (61) |
| 65 | Cu                                              | 0.1 M KHCO <sub>3</sub>                                                      | HCOOH             | 298   | 6.8  | -0.847 V vs. RHE | 1                       | 0.648               | 12.14                | 10.2                 | (63) |
| 66 | SnO <sub>2</sub>                                | 0.1 M NaHCO <sub>3</sub>                                                     | HCOOH             | 298   | 6.7  | -1.8 V vs. SHE   | 9.5                     | 1.60                | 93                   | 43.8                 | (64) |
| 70 | Cu nanoparticles                                | 0.1 M KHCO <sub>3</sub>                                                      | HCOOH             | 298   | 6.7  | -1.1 V vs. RHE   | 23                      | 0.901               | 5                    | 3.06                 | (65) |
| 74 | SnO <sub>x</sub> /Sn                            | 0.1 M KHCO <sub>3</sub>                                                      | HCOO <sup>-</sup> | 298   | 6.7  | -1.36 V vs. RHE  | 17.1                    | 1.16                | 71.6                 | 39.5                 | (69) |
| 83 | Cu                                              | 0.1 M KHCO <sub>3</sub>                                                      | HCOO <sup>-</sup> | 298   | 6.7  | -1.44 V vs. RHE  | 5.0                     | 1.24                | 9.4                  | 5.03                 | (72) |
| 85 | Au                                              |                                                                              | HCOO <sup>-</sup> |       |      | -1.14 V vs. RHE  | 5.0                     | 0.94                | 0.7                  | 0.422                |      |
| 87 | Ag                                              |                                                                              | HCOO <sup>-</sup> |       |      | -1.37 V vs. RHE  | 5.0                     | 1.17                | 0.8                  | 0.439                |      |
| 89 | Zn                                              |                                                                              | HCOO <sup>-</sup> |       |      | -1.54 V vs. RHE  | 5.0                     | 1.34                | 6.1                  | 3.14                 |      |

|     |    |  |                   |  |  |                 |     |      |      |       |  |
|-----|----|--|-------------------|--|--|-----------------|-----|------|------|-------|--|
| 92  | Pd |  | HCOO <sup>-</sup> |  |  | -1.20 V vs. RHE | 5.0 | 1.00 | 2.8  | 1.65  |  |
| 94  | Pb |  | HCOO <sup>-</sup> |  |  | -1.63 V vs. RHE | 5.0 | 1.43 | 97.4 | 48.6  |  |
| 95  | Hg |  | HCOO <sup>-</sup> |  |  | -1.51 V vs. RHE | 0.5 | 1.31 | 99.5 | 51.9  |  |
| 97  | In |  | HCOO <sup>-</sup> |  |  | -1.55 V vs. RHE | 5.0 | 1.35 | 94.9 | 48.7  |  |
| 99  | Sn |  | HCOO <sup>-</sup> |  |  | -1.48 V vs. RHE | 5.0 | 1.28 | 88.4 | 46.6  |  |
| 102 | Cd |  | HCOO <sup>-</sup> |  |  | -1.63 V vs. RHE | 5.0 | 1.43 | 78.4 | 39.1  |  |
| 103 | Tl |  | HCOO <sup>-</sup> |  |  | -1.60 V vs. RHE | 5.0 | 1.40 | 95.1 | 48.0  |  |
| 105 | Ni |  | HCOO <sup>-</sup> |  |  | -1.48 V vs. RHE | 5.0 | 1.28 | 1.4  | 0.738 |  |

### (c) C<sub>2</sub>H<sub>4</sub> production

| No | Electrocatalyst              | Electrolyte             | Product                       | T / K | pH  | E <sub>red</sub> | i / mA cm <sup>-2</sup> | η <sub>C</sub> / V | ε <sub>F</sub> / % | ε <sub>ec</sub> / % | Ref. |
|----|------------------------------|-------------------------|-------------------------------|-------|-----|------------------|-------------------------|--------------------|--------------------|---------------------|------|
| 5  | CuO                          | 0.1 M KHCO <sub>3</sub> | C <sub>2</sub> H <sub>4</sub> | 298   | 6.7 | -1.1 V vs. RHE   | 3                       | 1.18               | 26.8               | 13.2                | (17) |
| 6  | Sn-doped CuO                 |                         |                               |       |     |                  | 6                       |                    | 48.5               | 23.9                |      |
| 21 | Cu oxides/ZnO                | 0.1 M KHCO <sub>3</sub> | C <sub>2</sub> H <sub>4</sub> | 298   | 6.7 | -2.3 V vs. RHE   | 7.5                     | 2.77               | 91.1               | 29.8                | (28) |
| 27 | Cu nanoparticles             | Nafion                  | C <sub>2</sub> H <sub>4</sub> | 298   | 7.3 | -0.8 V vs. RHE   | 7.5                     | 0.874              | 92.8               | 52.8                | (33) |
| 52 | Cu nanocubes                 | 0.1 M KHCO <sub>3</sub> | C <sub>2</sub> H <sub>4</sub> | 298   | 6.7 | -1.1 V vs. RHE   | 5.6                     | 1.18               | 41                 | 20.2                | (54) |
| 54 | Pyridinic-N rich graphene/Cu | 0.5 M KHCO <sub>3</sub> | C <sub>2</sub> H <sub>4</sub> | 298   | 7.3 | -0.90 V vs. RHE  | 7.7 A g <sup>-1</sup>   | 0.979              | 19                 | 10.3                | (56) |
| 59 | Cu <sub>2</sub> O            | 0.1 M KHCO <sub>3</sub> | C <sub>2</sub> H <sub>4</sub> | 298   | 6.7 | -0.99 V vs. RHE  | 30                      | 1.07               | 39                 | 20.2                | (60) |
| 68 | Cu nanoparticles             | 0.1 M KHCO <sub>3</sub> | C <sub>2</sub> H <sub>4</sub> | 298   | 6.7 | -1.1 V vs. RHE   | 23                      | 1.18               | 20                 | 9.87                | (65) |
| 77 | Cu                           | 0.1 M KHCO <sub>3</sub> | C <sub>2</sub> H <sub>4</sub> | 298   | 6.7 | -1.36 V vs. RHE  | 2.5                     | 1.44               | 21.7               | 9.63                | (71) |
| 80 | Cu                           | 0.1 M KHCO <sub>3</sub> | C <sub>2</sub> H <sub>4</sub> | 298   | 6.7 | -1.44 V vs. RHE  | 5.0                     | 1.52               | 25.5               | 11.0                | (72) |

### (d) CH<sub>4</sub> production

| No | Electrocatalyst                        | Electrolyte             | Product         | T / K | pH   | E <sub>red</sub> | i / mA cm <sup>-2</sup> | η <sub>C</sub> / V | ε <sub>F</sub> / % | ε <sub>ec</sub> / % | Ref. |
|----|----------------------------------------|-------------------------|-----------------|-------|------|------------------|-------------------------|--------------------|--------------------|---------------------|------|
| 1  | Pt black                               | Nafion                  | CH <sub>4</sub> | 313   | -0.4 | 0.155 V vs. SHE  | 0.0023                  | 0.0141             | 23.2               | 22.9                | (13) |
| 7  | Pt <sub>0.8</sub> Ru <sub>0.2</sub> /C | Nafion                  | CH <sub>4</sub> | 313   | -0.4 | 0.175 V vs. SHE  | 0.14                    | -0.0063            | 18.2               | 18.3                | (18) |
| 8  | Pt/C                                   | Nafion                  | CH <sub>4</sub> | 313   | -0.4 | 0.135 V vs. SHE  | 0.06                    | 0.0337             | 12.3               | 11.9                | (19) |
| 10 | Pt/C                                   | Nafion                  | CH <sub>4</sub> | 313   | -0.4 | 0.075 V vs. SHE  | 11.8                    | 0.0937             | 6.8                | 6.25                | (20) |
| 12 | La <sub>2</sub> CuO <sub>4</sub>       | 1 M KOH                 | CH <sub>4</sub> | 298   | 9.6  | -1.4 V vs. RHE   | 117                     | 1.57               | 56.3               | 22.7                | (22) |
| 14 | Pt/C                                   | Nafion                  | CH <sub>4</sub> | 333   | -0.4 | 0.134 V vs. SHE  | 18.2                    | 0.0353             | 0.4                | 0.387               | (24) |
| 16 | Zn/Ag foams                            | 0.1 M KHCO <sub>3</sub> | CH <sub>4</sub> | 298   | 6.7  | -1.24 V vs. RHE  | 0.4                     | 1.41               | 3.1                | 1.33                | (26) |
| 42 | Cu nanoparticles                       | Nafion                  | CH <sub>4</sub> | 298   | 7.3  | -1.6 V vs. RHE   | 7.5                     | 1.77               | 12.1               | 4.53                | (46) |
| 48 | Mo <sub>2</sub> C                      | 0.1 M KHCO <sub>3</sub> | CH <sub>4</sub> | 298   | 6.7  | -1.1 V vs. RHE   | 13.62                   | 1.27               | 29                 | 13.2                | (51) |
| 63 | Cu                                     | 0.1 M KHCO <sub>3</sub> | CH <sub>4</sub> | 298   | 6.8  | -0.847 V vs. RHE | 1                       | 1.02               | 2.57               | 1.31                | (63) |

|     |                  |                         |                 |     |     |                 |     |      |      |       |      |
|-----|------------------|-------------------------|-----------------|-----|-----|-----------------|-----|------|------|-------|------|
| 67  | Cu nanoparticles | 0.1 M KHCO <sub>3</sub> | CH <sub>4</sub> | 298 | 6.7 | -1.1 V vs. RHE  | 23  | 1.27 | 57   | 25.9  | (65) |
| 76  | Cu               | 0.1 M KHCO <sub>3</sub> | CH <sub>4</sub> | 298 | 6.7 | -1.36 V vs. RHE | 2.5 | 1.53 | 22.3 | 9.13  | (71) |
| 79  | Cu               | 0.1 M KHCO <sub>3</sub> | CH <sub>4</sub> | 298 | 6.7 | -1.44 V vs. RHE | 5.0 | 1.61 | 33.3 | 13.2  | (72) |
| 80  | Pd               |                         |                 |     |     | -1.20 V vs. RHE | 5.0 | 1.37 | 2.9  | 1.26  |      |
| 100 | Cd               |                         |                 |     |     | -1.63 V vs. RHE | 5.0 | 1.80 | 1.3  | 0.482 |      |
| 104 | Ni               |                         |                 |     |     | -1.48 V vs. RHE | 5.0 | 1.65 | 1.8  | 0.704 |      |
